# Supplementary material
Source: bioRxiv or medRxiv preprint supplement (https://www.biorxiv.org/highwire/filestream/120997/field_highwire_adjunct_files/3/399931-4.pdf)
Supplement: Supplementary file [file 399931-4.pdf]

## Installation instructions for development version:

1. Please install DEBrowser (Version  $\geq 1.9.11$ ) and its dependencies by running the lines below in R or RStudio. (R Version  $\geq 3.5.0$ )

```
if (!requireNamespace("BiocManager", quietly=TRUE))
  install.packages("BiocManager")

BiocManager::install("debrowser", version = "devel")
```

2. Once you have installed the R package, you can call these R commands to start DEBrowser:

```
library(debrowser)
startDEBrowser()
```

For more details, please check the documentation and bioconductor pages:

<https://debrowser.readthedocs.io/en/master/>

<https://bioconductor.org/packages/release/bioc/html/debrowser.html>
